# Supplementary material
Source: Springer Nature journal article supplement (https://www.springermedizin.de/resource/supplementary/40478_2013_72_MOESM3_ESM.pdf/25658090)

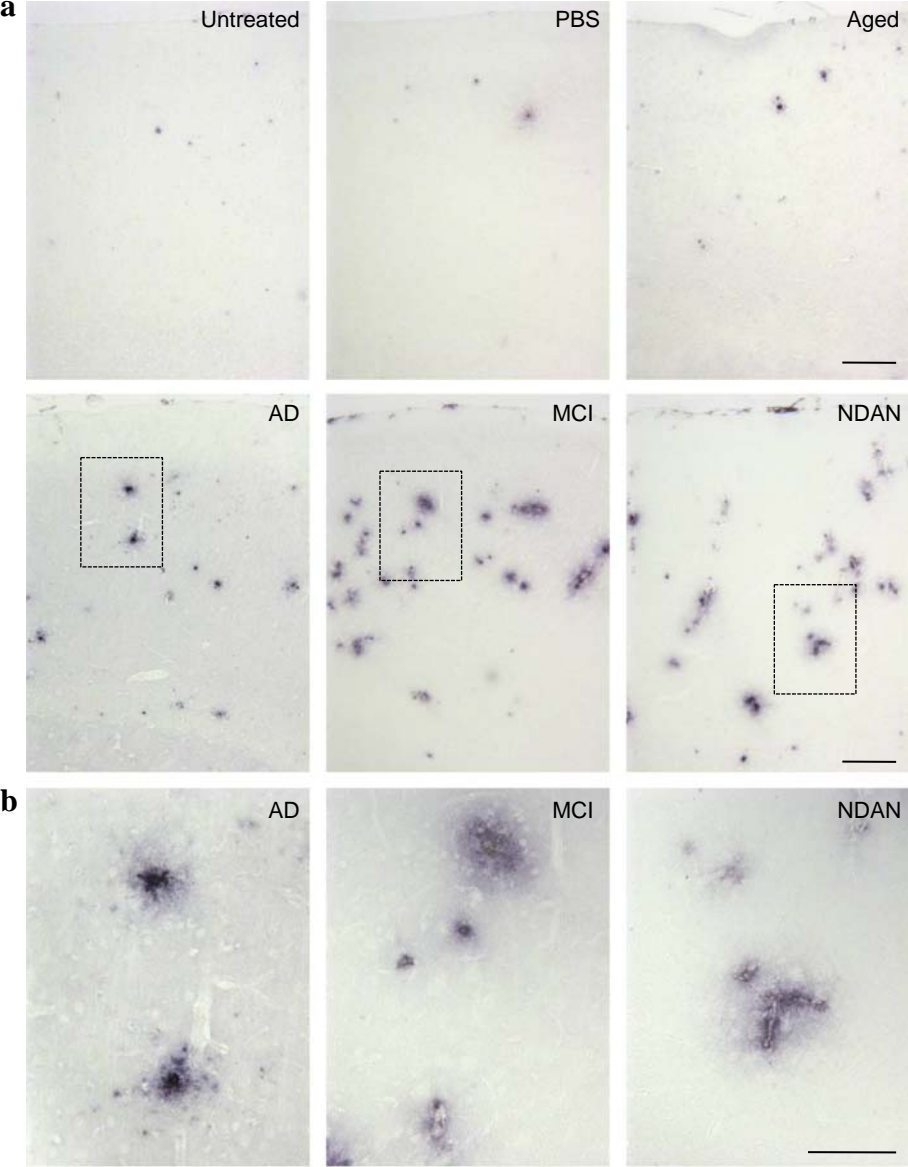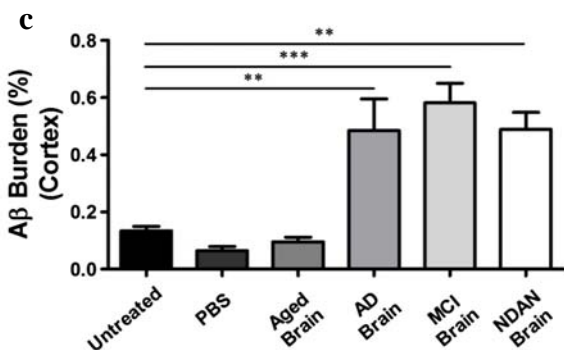

Supplement: MOESM3 [file 25658090]
